# Supplementary material for: The Application of Minimal Length in Klein-Gordon Equation with Hulthen Potential Using Asymptotic Iteration Method
Source: Hindawi journal article supplement (doi:10.1155/2018/9658679), 2018-07-02
Supplement: f1 [file 9658679.f1.pdf]

## Approximate Solution of Klein Gordon equation in Minimal Length effect for Hulthen potential using AIM

The Klein-Gordon equation is given

$$(E - V(r))^2 \psi(r, \theta, \varphi) = \left[ P^2 c^2 + (M_o c^2 + S(r))^2 \right] \psi(r, \theta, \varphi) \quad (1)$$

Momentum operator in minimal length formalism as follow

$$P = (1 + \alpha_{ML} \hat{p}) \hat{p}_i \quad (2)$$

Square term of equation (2) is given

$$P^2 = (1 + 2\alpha_{ML} p^2) p^2 \quad (3)$$

Here we have used  $\alpha_{ML}^2 \approx 0$ . with,

$$p = -i\hbar \nabla \quad (4)$$

$$p^2 = -\hbar^2 \nabla^2 = -\hbar^2 \Delta \quad (5)$$

Then, equation (3) and (5) is inserted in equation (1), we get

$$\begin{aligned} (E - V(r))^2 \psi(r, \theta, \varphi) &= \left[ (1 + 2\alpha_{ML} p^2) p^2 c^2 + (M_o c^2 + V(r))^2 \right] \psi(r, \theta, \varphi) \\ (E - V(r))^2 \psi(r, \theta, \varphi) &= \left[ (1 + 2\alpha_{ML} (-\hbar^2 \Delta)) (-\hbar^2 \Delta) c^2 + (M_o c^2 + S(r))^2 \right] \psi(r, \theta, \varphi) \\ (E - V(r))^2 \psi(r, \theta, \varphi) &= \left[ -(1 - 2\alpha_{ML} \hbar^2 \Delta) (\hbar^2 \Delta) c^2 + (M_o c^2 + S(r))^2 \right] \psi(r, \theta, \varphi) \end{aligned} \quad (6)$$

By setting  $\hbar = c = 1$  (natural unit),  $S(r) = V(r)$  and by setting  $V(r) \rightarrow \frac{1}{2}V(r)$ , in Eq. (6) become,

$$\begin{aligned} \left( E - \frac{1}{2}V(r) \right)^2 \psi(r, \theta, \varphi) &= \left[ -(\Delta - 2\alpha_{ML} \Delta^2) + \left( M_o + \frac{1}{2}V(r) \right)^2 \right] \psi(r, \theta, \varphi) \\ \left( E^2 - EV(r) + \frac{1}{4}V(r)^2 \right) \psi(r, \theta, \varphi) &= \left[ -(\Delta - 2\alpha_{ML} \Delta^2) + \left( M_o^2 + M_o V(r) + \frac{1}{4}V(r)^2 \right) \right] \psi(r, \theta, \varphi) \\ \left( E^2 - EV(r) + \frac{1}{4}V(r)^2 - M_o^2 - M_o V(r) - \frac{1}{4}V(r)^2 \right) \psi(r, \theta, \varphi) &= -(\Delta - 2\alpha_{ML} \Delta^2) \psi(r, \theta, \varphi) \\ (E^2 - M_o^2 - (E + M_o)V(r)) \psi(r, \theta, \varphi) &= -(\Delta - 2\alpha_{ML} \Delta^2) \psi(r, \theta, \varphi) \\ \left[ -\Delta + 2\alpha_{ML} \Delta^2 - (E^2 - M_o^2 - (E + M_o)V(r)) \right] \psi(r, \theta, \varphi) &= 0 \end{aligned} \quad (7)$$

By applying the modified approximate wave function which is modification of approximate wave function proposed by Chabab *et al.* in Ref [11] (Chabab *et al.*, 2016),

$$\psi(r, \theta, \varphi) = (1 + 2\alpha_{ML}\Delta)\phi(r, \theta, \varphi) \quad (8)$$

in equation (7), we have

$$\begin{aligned} & \left[ -\Delta + 2\alpha_{ML}\Delta^2 - (E^2 - M_o^2 - (E + M_o)V(r)) \right] (1 + 2\alpha_{ML}\Delta)\phi(r, \theta, \varphi) = 0 \\ & \left[ \begin{aligned} & -\Delta - 2\alpha_{ML}\Delta^2 + 2\alpha_{ML}\Delta^2 + 4\alpha_{ML}^2\Delta^3 - (E^2 - M_o^2 - (E + M_o)V(r)) \\ & -2\alpha_{ML}\Delta(E^2 - M_o^2 - (E + M_o)V(r)) \end{aligned} \right] \phi(r, \theta, \varphi) = 0 \end{aligned}$$

By setting  $\alpha_{ML}^2 \approx 0$ , then we have

$$\begin{aligned} & \left[ -\Delta - (E^2 - M_o^2 - (E + M_o)V(r)) - 2\alpha_{ML}\Delta(E^2 - M_o^2 - (E + M_o)V(r)) \right] \phi(r, \theta, \varphi) = 0 \\ & \left[ -(1 + 2\alpha_{ML}(E^2 - M_o^2 - (E + M_o)V(r)))\Delta - (E^2 - M_o^2 - (E + M_o)V(r)) \right] \phi(r, \theta, \varphi) = 0 \\ & \left[ -\Delta - \frac{(E^2 - M_o^2 - (E + M_o)V(r))}{(1 + 2\alpha_{ML}(E^2 - M_o^2 - (E + M_o)V(r)))} \right] \phi(r, \theta, \varphi) = 0 \end{aligned} \quad (9)$$

Equation (9) is similar with equation (20) in Chabab *et al.* Then, we use Binomial expansion for equation (9), we get

$$\begin{aligned} & \left[ \frac{1}{(1 + 2\alpha_{ML}(E^2 - M_o^2 - 2(E + M_o)V(r)))} \right] = (1 + 2\alpha_{ML}(E^2 - M_o^2 - 2(E + M_o)V(r)))^{-1} \\ & = 1 - \frac{2\alpha_{ML}(E^2 - M_o^2 - 2(E + M_o)V(r))}{1!} + \frac{(2\alpha_{ML}(E^2 - M_o^2 - 2(E + M_o)V(r)))^2}{2!} + \dots \\ & = 1 - 2\alpha_{ML}(E^2 - M_o^2 - 2(E + M_o)V(r)) \end{aligned}$$

We obtain,

$$\begin{aligned} & \left[ -\Delta - (E^2 - M_o^2 - (E + M_o)V(r))(1 - 2\alpha_{ML}(E^2 - M_o^2 - 2(E + M_o)V(r))) \right] \phi(r, \theta, \varphi) = 0 \\ & \left[ \Delta + (E^2 - M_o^2 - (E + M_o)V(r))(1 - 2\alpha_{ML}(E^2 - M_o^2 - 2(E + M_o)V(r))) \right] \phi(r, \theta, \varphi) = 0 \\ & \left[ \Delta + \left( (E^2 - M_o^2 - (E + M_o)V(r)) - 2\alpha_{ML}(E^2 - M_o^2 - (E + M_o)V(r))^2 \right) \right] \phi(r, \theta, \varphi) = 0 \end{aligned} \quad (10)$$

Operator Laplacian is given,

$$\Delta = \frac{1}{r^2} \frac{\partial}{\partial r} r^2 \frac{\partial}{\partial r} + \frac{1}{r^2} \frac{1}{\sin \theta} \frac{\partial}{\partial \theta} \sin \theta \frac{\partial}{\partial \theta} + \frac{1}{r^2} \frac{1}{\sin^2 \theta} \frac{\partial^2}{\partial \varphi^2} \quad (11)$$

Equation (11) is substituted in equation (10), is yields

$$\left[ \left( \frac{1}{r^2} \frac{\partial}{\partial r} r^2 \frac{\partial}{\partial r} + \frac{1}{r^2} \frac{1}{\sin \theta} \frac{\partial}{\partial \theta} \sin \theta \frac{\partial}{\partial \theta} + \frac{1}{r^2} \frac{1}{\sin^2 \theta} \frac{\partial^2}{\partial \varphi^2} \right) + \begin{pmatrix} (E^2 - M_o^2 - (E + M_o)V(r)) \\ -2\alpha_{ML} (E^2 - M_o^2 - (E + M_o)V(r))^2 \end{pmatrix} \right] \phi(r, \theta, \varphi) = 0$$

$$\left[ \left( \frac{1}{r^2} \frac{\partial}{\partial r} r^2 \frac{\partial}{\partial r} + \frac{1}{r^2} \frac{1}{\sin \theta} \frac{\partial}{\partial \theta} \sin \theta \frac{\partial}{\partial \theta} + \frac{1}{r^2} \frac{1}{\sin^2 \theta} \frac{\partial^2}{\partial \varphi^2} \right) + \begin{pmatrix} (E^2 - M_o^2 - (E + M_o)V(r)) \\ -2\alpha_{ML} \begin{pmatrix} (E^2 - M_o^2)^2 \\ -2(E^2 - M_o^2)(E + M_o)V(r) \\ +(E + M_o)^2 V^2(r) \end{pmatrix} \end{pmatrix} \right] \phi(r, \theta, \varphi) = 0$$

$$\left[ \left( \frac{1}{r^2} \frac{\partial}{\partial r} r^2 \frac{\partial}{\partial r} + \frac{1}{r^2} \frac{1}{\sin \theta} \frac{\partial}{\partial \theta} \sin \theta \frac{\partial}{\partial \theta} + \frac{1}{r^2} \frac{1}{\sin^2 \theta} \frac{\partial^2}{\partial \varphi^2} \right) + \begin{pmatrix} (E^2 - M_o^2) - (E + M_o)V(r) - 2\alpha_{ML} (E^2 - M_o^2)^2 \\ +4\alpha_{ML} (E^2 - M_o^2)(E + M_o)V(r) \\ -2\alpha_{ML} (E + M_o)^2 V^2(r) \end{pmatrix} \right] \phi(r, \theta, \varphi) = 0 \quad (12)$$

By using separable variable method, we have new wave fuction

$$\phi(r, \theta, \varphi) = R(r)\Theta(\theta)\Phi(\varphi) \quad (13)$$

Equation (13) is inserted in equation (12) is given

$$\left[ \left( \frac{1}{r^2} \frac{\partial}{\partial r} r^2 \frac{\partial}{\partial r} + \frac{1}{r^2} \frac{1}{\sin \theta} \frac{\partial}{\partial \theta} \sin \theta \frac{\partial}{\partial \theta} + \frac{1}{r^2} \frac{1}{\sin^2 \theta} \frac{\partial^2}{\partial \varphi^2} \right) + \begin{pmatrix} (E^2 - M_o^2) - (E + M_o)V(r) - 2\alpha_{ML} (E^2 - M_o^2)^2 \\ +4\alpha_{ML} (E^2 - M_o^2)(E + M_o)V(r) \\ -2\alpha_{ML} (E + M_o)^2 V^2(r) \end{pmatrix} \right] R(\beta)\Theta(\theta)\Phi(\varphi) = 0$$

$$\left[ \left( \frac{\Theta(\theta)\Phi(\varphi)}{r^2} \frac{\partial}{\partial r} r^2 \frac{\partial R(r)}{\partial r} + \frac{R(r)\Phi(\varphi)}{r^2} \frac{1}{\sin\theta} \frac{\partial}{\partial\theta} \sin\theta \frac{\partial\Theta(\theta)}{\partial\theta} + \frac{R(r)\Theta(\theta)\Phi(\varphi)}{r^2} \frac{1}{\sin^2\theta} \frac{\partial^2\Phi(\varphi)}{\partial\varphi^2} \right) + \left( \begin{array}{l} (E^2 - M_o^2) - (E + M_o)V(r) - 2\alpha_{ML}(E^2 - M_o^2)^2 \\ + 4\alpha_{ML}(E^2 - M_o^2)(E + M_o)V(r) \\ - 2\alpha_{ML}(E + M_o)^2 V(r)^2 \end{array} \right) R(\beta)\Phi(\varphi)\Theta(\theta) \right] = 0 \quad (14)$$

Equation (14) divided by  $R(r)\Theta(\theta)\Phi(\varphi)$ , so

$$\left[ \left( \frac{1}{R(r)r^2} \frac{\partial}{\partial r} r^2 \frac{\partial R(r)}{\partial r} + \frac{1}{\Theta(\theta)r^2} \frac{1}{\sin\theta} \frac{\partial}{\partial\theta} \sin\theta \frac{\partial\Theta(\theta)}{\partial\theta} + \frac{\Phi(\varphi)}{r^2} \frac{1}{\sin^2\theta} \frac{\partial^2\Phi(\varphi)}{\partial\varphi^2} \right) + \left( \begin{array}{l} (E^2 - M_o^2) - (E + M_o)V(r) - 2\alpha_{ML}(E^2 - M_o^2)^2 \\ + 4\alpha_{ML}(E^2 - M_o^2)(E + M_o)V(r) - 2\alpha_{ML}(E + M_o)^2 V(r)^2 \end{array} \right) \right] = 0 \quad (15)$$

Then equation (15) is multiplied by  $r^2$ , so

$$\left[ \left( \frac{1}{R(r)} \frac{\partial}{\partial r} r^2 \frac{\partial R(r)}{\partial r} + \frac{1}{\Theta(\theta)} \frac{1}{\sin\theta} \frac{\partial}{\partial\theta} \sin\theta \frac{\partial\Theta(\theta)}{\partial\theta} + \frac{1}{\Phi(\varphi)} \frac{1}{\sin^2\theta} \frac{\partial^2\Phi(\varphi)}{\partial\varphi^2} \right) + \left( \begin{array}{l} (E^2 - M_o^2) - (E + M_o)V(r) - 2\alpha_{ML}(E^2 - M_o^2)^2 \\ + 4\alpha_{ML}(E^2 - M_o^2)(E + M_o)V(r) \\ - 2\alpha_{ML}(E + M_o)^2 V(r)^2 \end{array} \right) r^2 \right] = 0 \quad (16)$$

Next, equation (16) can be written

$$\left\{ \left[ \frac{1}{R(r)} \frac{\partial}{\partial r} r^2 \frac{\partial R(r)}{\partial r} + \left( \begin{array}{l} (E^2 - M_o^2) - (E + M_o)V(r) - 2\alpha_{ML}(E^2 - M_o^2)^2 \\ + 4\alpha_{ML}(E^2 - M_o^2)(E + M_o)V(r) - 2\alpha_{ML}(E + M_o)^2 V(r)^2 \end{array} \right) r^2 \right] \right. \\ \left. = - \left[ \frac{1}{\Theta(\theta)} \frac{1}{\sin\theta} \frac{\partial}{\partial\theta} \sin\theta \frac{\partial\Theta(\theta)}{\partial\theta} + \frac{1}{\Phi(\varphi)} \frac{1}{\sin^2\theta} \frac{\partial^2\Phi(\varphi)}{\partial\varphi^2} \right] = \lambda \right\} \quad (17)$$

Equation (17) consist of radial and polar part, the polar part as follows,

$$- \left[ \frac{1}{\Theta(\theta)} \frac{1}{\sin\theta} \frac{\partial}{\partial\theta} \sin\theta \frac{\partial\Theta(\theta)}{\partial\theta} + \frac{1}{\Phi(\varphi)} \frac{1}{\sin^2\theta} \frac{\partial^2\Phi(\varphi)}{\partial\varphi^2} \right] = \lambda \quad (18)$$

and radial part is given,

$$\left[ \frac{1}{R(r)} \frac{\partial}{\partial r} r^2 \frac{\partial R(r)}{\partial r} + \left( \frac{(E^2 - M_o^2) - (E + M_o)V(r) - 2\alpha_{ML}(E^2 - M_o^2)^2}{+4\alpha_{ML}(E^2 - M_o^2)(E + M_o)V(r) - 2\alpha_{ML}(E + M_o)^2 V(r)^2} \right) r^2 \right] = \lambda \quad (19)$$

In this paper, we use a radial part to get energy of Klein Gordon equation in minimal length effect. The radial part of equation (19) is multiplied by  $\frac{R(r)}{r^2}$ , so we get

$$\left[ \frac{1}{r^2} \frac{\partial}{\partial r} r^2 \frac{\partial R(r)}{\partial r} + \left( \frac{(E^2 - M_o^2) - (E + M_o)V(r) - 2\alpha_{ML}(E^2 - M_o^2)^2}{+4\alpha_{ML}(E^2 - M_o^2)(E + M_o)V(r) - 2\alpha_{ML}(E + M_o)^2 V(r)^2} \right) R(r) \right] = \frac{\lambda}{r^2} R(r) \quad (20)$$

By setting  $R(r) = \frac{U_H(r)}{r}$  in equation (20), we have

$$\left[ \frac{1}{r^2} \frac{\partial}{\partial r} r^2 \frac{\partial U_H(r)}{\partial r} \frac{1}{r} + \left( \frac{(E^2 - M_o^2) - (E + M_o)V(r) - 2\alpha_{ML}(E^2 - M_o^2)^2}{+4\alpha_{ML}(E^2 - M_o^2)(E + M_o)V(r) - 2\alpha_{ML}(E + M_o)^2 V(r)^2} \right) \frac{U_H(r)}{r} \right] = \frac{\lambda}{r^2} \frac{U_H(r)}{r} \quad (21)$$

where

$$\begin{aligned} \frac{1}{r^2 R(r)} \frac{\partial}{\partial r} r^2 \frac{\partial U_H(r)}{\partial r} \frac{1}{r} &= \frac{1}{r^2} \frac{\partial}{\partial r} r^2 \left[ \frac{1}{r} \frac{dU_H(r)}{dr} - \frac{1}{r^2} U_H(r) \right] \\ &= \frac{1}{r^2} \frac{\partial}{\partial r} \left[ r \frac{dU_H(r)}{dr} - U_H(r) \right] \\ &= \frac{1}{r^2} \left[ r \frac{d^2 U_H(r)}{dr^2} + \frac{dU_H(r)}{dr} - \frac{dU_H(r)}{dr} \right] \\ &= \frac{1}{r^2} \left[ r \frac{d^2 U_H(r)}{dr^2} \right] \\ &= \frac{1}{r} \frac{d^2 U_H(r)}{dr^2} \end{aligned} \quad (22)$$

Equation (22) is substituted in equation (23) and multiplied  $r$ , is yields

$$\left[ \frac{d^2 U_H(r)}{dr^2} \left( \frac{(E^2 - M_o^2) - (E + M_o)V(r) - 2\alpha_{ML}(E^2 - M_o^2)^2}{+4\alpha_{ML}(E^2 - M_o^2)(E + M_o)V(r) - 2\alpha_{ML}(E + M_o)^2 V(r)^2} \right) U_H(r) \right] = \frac{\lambda}{r^2} U_H(r) \quad (23)$$

with,

$$\lambda = L(L+1) \quad (24)$$

So we have,

$$\frac{d^2 U_H(r)}{dr^2} - \frac{L(L+1)}{r^2} U_H(r) + \left( \begin{aligned} & (E^2 - M_o^2) - (E + M_o)V(r) - 2\alpha_{ML}(E^2 - M_o^2)^2 \\ & + 4\alpha_{ML}(E^2 - M_o^2)(E + M_o)V(r) - 2\alpha_{ML}(E + M_o)^2 V(r)^2 \end{aligned} \right) U_H(r) = 0 \quad (25)$$

The Hulthen potential is given by

$$\begin{aligned} V_H(r) &= -V_o \frac{e^{-2\omega_H r}}{1 - e^{-2\omega_H r}} = -V_o \frac{e^{-\omega_H r}}{e^{\omega_H r} - e^{-\omega_H r}} \\ &= -V_o \frac{\cosh \omega_H r - \sinh \omega_H r}{2 \sinh \omega_H r} \\ &= \frac{V_o}{2} (1 - \coth \omega_H r) \\ &= \left( \frac{V_o}{2} - \frac{V_o}{2} \coth \omega_H r \right) \end{aligned} \quad (26)$$

The square term of Hulthen potential as follow,

$$\begin{aligned} V^2(r) &= \left( -V_o \omega_H \frac{e^{-\omega_H r}}{e^{\omega_H r} - e^{-\omega_H r}} \right)^2 = \left( \frac{V_o \omega_H}{2} - \frac{V_o \omega_H}{2} \coth \omega_H r \right)^2 \\ &= \frac{(V_o \omega_H)^2}{4} \coth^2 \omega_H r - 2 \frac{(V_o \omega_H)^2}{4} \coth \omega_H r + \frac{(V_o \omega_H)^2}{4} \\ &= \frac{(V_o \omega_H)^2}{4} \coth^2 \omega_H r - \frac{(V_o \omega_H)^2}{2} \coth \omega_H r + \frac{(V_o \omega_H)^2}{4} \end{aligned} \quad (27)$$

Equation (26) and (27) is inserting in equation (25), so we get

$$\frac{d^2 U_H(r)}{dr^2} - \frac{L(L+1)}{r^2} U_H(r) + \left( \begin{aligned} & (E^2 - M_o^2) - 2\alpha_{ML}(E^2 - M_o^2)^2 \\ & - (E + M_o) \left( \frac{(V_o \omega_H)}{2} - \frac{(V_o \omega_H)}{2} \coth \omega_H r \right) \\ & + 4\alpha_{ML}(E^2 - M_o^2)(E + M_o) \left( \frac{(V_o \omega_H)}{2} - \frac{(V_o \omega_H)}{2} \coth \omega_H r \right) \\ & - 2\alpha_{ML}(E + M_o)^2 \left( \begin{aligned} & \frac{(V_o \omega_H)^2}{4} \coth^2 \omega_H r \\ & - \frac{(V_o \omega_H)^2}{2} \coth \omega_H r + \frac{(V_o \omega_H)^2}{4} \end{aligned} \right) \end{aligned} \right) U_H(r) = 0$$

$$\begin{aligned}
& \left. \begin{aligned}
& \frac{d^2 U_H(r)}{dr^2} - \frac{L(L+1)}{r^2} U_H(r) + \left( \begin{aligned}
& (E^2 - M_o^2) - 2\alpha_{ML} (E^2 - M_o^2)^2 \\
& + (E + M_o) \frac{(V_o \omega_H)}{2} \coth \omega_H r - (E + M_o) \frac{(V_o \omega_H)}{2} \\
& - 2\alpha_{ML} (E^2 - M_o^2) (E + M_o) (V_o \omega_H) \coth \omega_H r \\
& + 2\alpha_{ML} (E^2 - M_o^2) (E + M_o) (V_o \omega_H) \\
& - \alpha_{ML} (E + M_o)^2 \frac{(V_o \omega_H)^2}{2} (1 + \operatorname{csch}^2 \omega_H r) \\
& + \alpha_{ML} (E + M_o)^2 (V_o \omega_H)^2 \coth \omega_H r - \alpha_{ML} (E + M_o)^2 \frac{(V_o \omega_H)^2}{2}
\end{aligned} \right) U_H(r) = 0
\end{aligned} \right\} \\
& \left. \begin{aligned}
& \frac{d^2 U_H(r)}{dr^2} - \frac{L(L+1)}{r^2} U_H(r) + \left( \begin{aligned}
& -\alpha_{ML} (E + M_o)^2 \frac{(V_o \omega_H)^2}{2} \operatorname{csch}^2 \omega_H r \\
& + \left( (E + M_o) \frac{(V_o \omega_H)}{2} + \alpha_{ML} (E + M_o)^2 (V_o \omega_H)^2 \right) \coth \omega_H r \\
& - 2\alpha_{ML} (E^2 - M_o^2) (E + M_o) (V_o \omega_H) \\
& + \left( (E^2 - M_o^2) - (E + M_o) \frac{(V_o \omega_H)}{2} \right) \\
& + 2\alpha_{ML} (E^2 - M_o^2) (E + M_o) (V_o \omega_H) \\
& - \alpha_{ML} (E + M_o)^2 (V_o \omega_H)^2 - 2\alpha_{ML} (E^2 - M_o^2)^2
\end{aligned} \right) U_H(r) = 0
\end{aligned} \right\} \quad (28)
\end{aligned}$$

The approximation of function  $1/r^2$  is given as

$$\frac{1}{r^2} = \frac{\omega_H^2}{\sinh^2 \omega_H r} \quad (29)$$

By inserting equation (29) in equation (28), we have

$$\left\{ \begin{array}{l} \frac{d^2 U_H(r)}{dr^2} - \left[ \frac{\omega_H^2 L(L+1) + \alpha_{ML} (E + M_o)^2 \frac{(V_o \omega_H)^2}{2}}{\sinh^2 \omega_H r} \right] U_H(r) \\ + \left[ \begin{array}{l} \left( (E + M_o) \frac{(V_o \omega_H)}{2} + \alpha_{ML} (E + M_o)^2 (V_o \omega_H)^2 \right) \coth \omega_H r \\ - 2\alpha_{ML} (E^2 - M_o^2) (E + M_o) (V_o \omega_H) \end{array} \right] U_H(r) \\ + \left[ \begin{array}{l} \left( (E^2 - M_o^2) - (E + M_o) \frac{(V_o \omega_H)}{2} \right) \\ + 2\alpha_{ML} (E^2 - M_o^2) (E + M_o) (V_o \omega_H) \\ - \alpha_{ML} (E + M_o)^2 (V_o \omega_H)^2 - 2\alpha_{ML} (E^2 - M_o^2)^2 \end{array} \right] U_H(r) \end{array} \right\} = 0 \quad (30)$$

To get simple equation, the equation (30) is reduce become

$$\frac{d^2 U_H(r)}{dr^2} - \left[ \frac{v_{PH} (v_{PH} - 1)}{\sinh^2 \omega_H r} - 2q_{PH} \coth \omega_H r + \kappa_{PH}^2 \right] U_H(r) = 0 \quad (31)$$

where

$$v_{PH} (v_{PH} - 1) = \left( \omega_H^2 L(L+1) + \alpha_{ML} (E + M_o)^2 \frac{(V_o \omega_H)^2}{2} \right) \quad (32)$$

$$2q_{PH} = \left( (E + M_o) \frac{(V_o \omega_H)}{2} + \alpha_{ML} (E + M_o)^2 (V_o \omega_H)^2 - 2\alpha_{ML} (E^2 - M_o^2) (E + M_o) (V_o \omega_H) \right) \quad (33)$$

$$-\kappa_{PH}^2 = \left( \begin{array}{l} \left( (E^2 - M_o^2) - (E + M_o) \frac{(V_o \omega_H)}{2} + 2\alpha_{ML} (E^2 - M_o^2) (E + M_o) (V_o \omega_H) \right) \\ - \alpha_{ML} (E + M_o)^2 (V_o \omega_H)^2 - 2\alpha_{ML} (E^2 - M_o^2)^2 \end{array} \right) \quad (34)$$

Equation (34) is second order differential equation that will be reduced to hypergeometric differential equation type, by letting

$$\coth \omega_H r = 1 - 2z \quad (35)$$

$$-\omega_H \operatorname{csch}^2 \omega_H r dr = -2dz \quad (36)$$

$$\frac{1}{\sinh^2 \omega_H r} = \operatorname{csc}^2 \omega_H r = \coth^2 \omega_H r - 1 = (1 - 2z)^2 - 1 = (1 - 4z + 4z^2) - 1 = -4z + 4z^2 = 4z^2 - 4z = 4z(z - 1) \quad (37)$$

$$\frac{dz}{dr} = \frac{-\omega_H \operatorname{csch}^2 \omega_H r}{-2} = \frac{\omega_H \operatorname{csch}^2 \omega_H r}{2} = \frac{4\omega_H z(z - 1)}{2} = 2\omega_H z(z - 1) \quad (38)$$



$$\frac{d}{dr} = \frac{d}{dz} \frac{dz}{dr} = 2\omega_H(z^2 - z) \frac{d}{dz} \quad (39)$$

$$\begin{aligned} \frac{d^2}{d\beta^2} &= 2\omega_H z(z-1) \frac{d}{dz} \left( 2\omega_H z(z-1) \frac{d}{dz} \right) \\ &= 2\omega_H z(z-1) \left( 2\omega_H z(z-1) \frac{d^2}{dz^2} + 2\omega_H(2z-1) \frac{d}{dz} \right) \\ &= 4\omega_H^2 z^2(z-1)^2 \frac{d^2}{dz^2} + 4\omega_H^2 z(z-1)(2z-1) \frac{d}{dz} \end{aligned} \quad (40)$$

Then, equation (39) and (40) is substituted in equation (34), we get

$$\begin{aligned} 4\omega^2 z^2(z-1)^2 \frac{d^2 U_H(r)}{dz^2} + 4\omega_H^2 z(z-1)(2z-1) \frac{dU_H(r)}{dz} - [4v_{PH}(v_{PH}-1)z(z-1) - 2q_{PH}(1-2z) + \kappa_{PH}^2] U_H(r) &= 0 \\ z(1-z) \frac{d^2 U_H(r)}{dz^2} + (1-2z) \frac{dU_H(r)}{dz} + \left[ \frac{v_{PH}(v_{PH}-1)}{\omega_H^2} + \frac{2q(1-2z)}{4\omega_H^2 z(1-z)} - \frac{\kappa_{PH}^2}{4\omega_H^2 z(1-z)} \right] U_H(r) &= 0 \\ z(1-z) \frac{d^2 U_H(r)}{dz^2} + (1-2z) \frac{dU_H(r)}{dz} + \left[ v'_{PH}(v'_{PH}-1) + \frac{2q'_{PH}(1-2z)}{4z(1-z)} - \frac{\kappa'^2_{PH}}{4z(1-z)} \right] U_H(r) &= 0 \end{aligned} \quad (41)$$

with

$$v'_{PH}(v'_{PH}-1) = \frac{v_{PH}(v_{PH}-1)}{\omega_H^2} \quad (42)$$

$$2q'_{PH} = \frac{2q_{PH}}{\omega_H^2} \quad (43)$$

$$\kappa'^2_{PH} = \frac{\kappa_{PH}^2}{\omega_H^2} \quad (44)$$

To solve a part of equation (41) is use

$$\frac{1}{4z(1-z)} = \frac{1}{4z} + \frac{1}{4(1-z)} \quad (45)$$

Then equation (45) is substituted in equation (41), we get

$$\begin{aligned}
& v'_{PH} (v'_{PH} - 1) + \frac{2q'_{PH} (1-2z)}{4z(1-z)} - \frac{\kappa'^2_{PH}}{4z(1-z)} \\
& v'_{PH} (v'_{PH} - 1) + \frac{2q'_{PH}}{4z(1-z)} - \frac{4q'_{PH}z}{4z(1-z)} - \frac{\kappa'^2_{PH}}{4z(1-z)} \\
& v'_{PH} (v'_{PH} - 1) + \frac{2q'_{PH}}{4z} + \frac{2q'_{PH}}{4(1-z)} - \frac{4q'_{PH}}{4(1-z)} - \frac{\kappa'^2_{PH}}{4z} - \frac{\kappa'^2_{PH}}{4(1-z)} \\
& v'_{PH} (v'_{PH} - 1) + \frac{2q'_{PH}}{4z} - \frac{2q'_{PH}}{4(1-z)} - \frac{\kappa'^2_{PH}}{4z} - \frac{\kappa'^2_{PH}}{4(1-z)} \\
& v'_{PH} (v'_{PH} - 1) - \frac{-2q'_{PH} + \kappa'^2_{PH}}{4z} - \frac{2q'_{PH} + \kappa'^2_{PH}}{4(1-z)}
\end{aligned}$$

So equation (41) become,

$$z(1-z) \frac{d^2 U_H(r)}{dz^2} + (1-2z) \frac{dU_H(r)}{dz} + \left[ v'_{PH} (v'_{PH} - 1) - \frac{-2q'_{PH} + \kappa'^2_{PH}}{4z} - \frac{2q'_{PH} + \kappa'^2_{PH}}{4(1-z)} \right] U_H(r) = 0 \quad (46)$$

where,

$$-2q'_{PH} + \kappa'^2_{PH} = 4\alpha'^2_{PH}$$

and

$$2q'_{PH} + \kappa'^2_{PH} = 4\beta'^2_{PH} \quad (47)$$

By inserting equation (47) in equation (46), so we have

$$z(1-z) \frac{d^2 U_H(r)}{dz^2} + (1-2z) \frac{dU_H(r)}{dz} + \left[ v'_{PH} (v'_{PH} - 1) - \frac{4\alpha'^2_{PH}}{4z} - \frac{4\beta'^2_{PH}}{4(1-z)} \right] U_H(r) = 0 \quad (48)$$

To transform AIM type, we use new wave function is given

$$U_H(r) = z^{\alpha_{PH}} (1-z)^{\beta_{PH}} f(z) \quad (49)$$

The equation (48) is differential of  $z$ , the first differential equation (48) is

$$\frac{dU_H(r)}{dz} = \frac{\alpha_{PH}}{z} z^{\alpha_{PH}} (1-z)^{\beta_{PH}} f_H(z) - \frac{\beta_{PH}}{(1-z)} z^{\alpha_{PH}} (1-z)^{\beta_{PH}} f_H(z) + z^{\alpha_{PH}} (1-z)^{\beta_{PH}} f'_H(z) \quad (50)$$

The second differential equation is

$$\frac{d^2 U_H(r)}{dz^2} = \left[ \begin{aligned} & \frac{\alpha_{PH}(\alpha_{PH}-1)}{z^2} z^{\alpha_{PH}} (1-z)^{\beta_{PH}} f_H(z) + \frac{\beta_{PH}(\beta_{PH}-1)}{(1-z)^2} z^{\alpha_{PH}} (1-z)^{\beta_{PH}} f_H(z) \\ & + z^{\alpha_{PH}} (1-z)^{\beta_{PH}} f''_H(z) - \frac{2\alpha_{PH}\beta_{PH}}{z(1-z)} z^{\alpha_{PH}} (1-z)^{\beta_{PH}} f_H(z) \\ & + \frac{2\alpha_{PH}}{z} z^{\alpha_{PH}} (1-z)^{\beta_{PH}} f'_H(z) - \frac{2\beta_{PH}}{(1-z)} z^{\alpha_{PH}} (1-z)^{\beta_{PH}} f'_H(z) \end{aligned} \right] \quad (51)$$

Then equation (49) (50) and (51) is substituted in equation (48), so we obtain

$$\left\{ \begin{aligned} & \left[ \frac{\alpha_{PH}(\alpha_{PH}-1)}{z^2} z^{\alpha_{PH}} (1-z)^{\beta_{PH}} f_H(z) + \frac{\beta_{PH}(\beta_{PH}-1)}{(1-z)^2} z^{\alpha_{PH}} (1-z)^{\beta_{PH}} f_H(z) \right] \\ & + z^{\alpha_{PH}} (1-z)^{\beta_{PH}} f_H''(z) - \frac{2\alpha_{PH}\beta_{PH}}{z(1-z)} z^{\alpha_{PH}} (1-z)^{\beta_{PH}} f_H'(z) \\ & + \frac{2\alpha_{PH}}{z} z^{\alpha_{PH}} (1-z)^{\beta_{PH}} f_H'(z) - \frac{2\beta_{LC}}{(1-y)} y^{\alpha_{LC}} (1-y)^{\beta_{LC}} g_C'(y) \\ & + (1-2z) \left[ \frac{\alpha_{PH}}{z} z^{\alpha_{PH}} (1-z)^{\beta_{PH}} f_H(z) - \frac{\beta_{LC}}{(1-z)} z^{\alpha_{PH}} (1-z)^{\beta_{PH}} f_H(z) \right] \\ & + \left[ v_{PH}'(v_{PH}'-1) - \frac{4\alpha_{PH}^2}{4z} - \frac{4\beta_{PH}^2}{4(1-z)} \right] \left[ z^{\alpha_{PH}} (1-z)^{\beta_{PH}} f_H(z) \right] \end{aligned} \right\} = 0 \quad (52)$$

$$\begin{aligned} & \left[ \frac{\alpha_{PH}(\alpha_{PH}-1)}{z} f_H(z) - \alpha_{PH}(\alpha_{PH}-1) f_H(z) + \frac{z\beta_{PH}(\beta_{PH}-1)}{(1-z)} f_H(z) \right] \\ & + z(1-z) f_H''(z) - 2\alpha_{PH}\beta_{PH} f_H'(z) + 2\alpha_{PH}(1-z) f_H'(z) - 2z\beta_{PH} f_H'(z) \\ & + \left[ \frac{\alpha_{PH}}{z} f_H(z) - 2\alpha_{PH} f_H(z) - (1-2z) \frac{\beta_{PH}}{(1-z)} f_H(z) + (1-2z) f_H'(z) \right] \\ & + \left[ v_{PH}'(v_{PH}'-1) - \frac{4\alpha_{PH}^2}{4z} - \frac{4\beta_{PH}^2}{4(1-z)} \right] f_H(z) = 0 \end{aligned} \quad (53)$$

Solve a part of equation (53) is given

$$\begin{aligned} \frac{z\beta_{PH}(\beta_{PH}-1)}{(1-z)} &= \frac{(1-1+z)\beta_{PH}(\beta_{PH}-1)}{(1-z)} \\ &= \frac{\beta_{PH}(\beta_{PH}-1)}{(1-z)} - \frac{(1-z)\beta_{PH}(\beta_{PH}-1)}{(1-z)} \\ &= \frac{\beta_{PH}(\beta_{PH}-1)}{(1-z)} - \beta_{PH}(\beta_{PH}-1) \end{aligned} \quad (54)$$

$$\begin{aligned}
(1-2z)\frac{\beta_{PH}}{(1-z)} &= 2\left(\frac{1}{2}-z\right)\frac{\beta_{PH}}{(1-z)} \\
&= 2\frac{(\frac{1}{2}+\frac{1}{2}-\frac{1}{2}-z)\beta_{PH}}{(1-z)} \\
&= 2\left(\frac{(1-z)\beta_{PH}}{(1-z)} - \frac{1}{2}\frac{\beta_{PH}}{(1-z)}\right) \\
&= 2\beta_{PH} - \frac{\beta_{PH}}{(1-z)}
\end{aligned} \tag{55}$$

Then , equation (54) and (55) is inserted in equation (53), we have

$$\left\{ \begin{aligned} &\left[ \frac{\alpha_{PH}(\alpha_{PH}-1)}{z} + \frac{\alpha_{PH}}{z} - 2\alpha_{PH} - \alpha_{PH}(\alpha_{PH}-1) - 2\beta_{PH} - \beta_{PH}(\beta_{PH}-1) \right. \\ &+ \left. \frac{\beta_{PH}(\beta_{PH}-1)}{(1-z)} + \frac{\beta_{PH}}{(1-z)} - \frac{4\beta_{PH}^2}{4(1-z)} - \frac{4\alpha_{PH}^2}{4z} - 2\alpha_{PH}\beta_{PH} + v'_{PH}(v'_{PH}-1) \right] f_H(z) \\ &+ \left[ 2\alpha_{PH}(1-z) - 2z\beta_{PH} + 1 - 2z \right] f'_H(z) + z(1-z)f''_H(z) \end{aligned} \right\} = 0 \tag{56}$$

where

$$\frac{\alpha_{PH}(\alpha_{PH}-1)}{z} + \frac{\alpha_{PH}}{z} - \frac{4\alpha_{PH}^2}{4z} = \frac{4\alpha_{PH}^2 - 4\alpha_{PH} + 4\alpha_{PH} - 4\alpha_{PH}^2}{4z} = 0 \tag{57}$$

$$\frac{\beta_{PH}(\beta_{PH}-1)}{(1-z)} + \frac{\beta_{PH}}{(1-z)} - \frac{4\beta_{PH}^2}{4(1-z)} = \frac{4\beta_{PH}^2 - 4\beta_{PH} + 4\beta_{PH} - 4\beta_{PH}^2}{(1-z)} = 0 \tag{58}$$

So equation (56) become,

$$\left\{ \begin{aligned} &z(1-z)f''_H(z) + \left[ (2\alpha_{PH}+1) - (2\alpha_{PH}+2\beta_{PH}+2)z \right] f'_H(z) \\ &+ \left[ v'_{PH}(v'_{PH}-1) - (\alpha_{PH}+\beta_{PH})(\alpha_{PH}+\beta_{PH}+1) \right] f_H(z) \end{aligned} \right\} = 0 \tag{59}$$

Next, equation (59) to transform in AIM type is given

$$f''_H(z) + \left[ \frac{(2\alpha_{PH}+1) - (2\alpha_{PH}+2\beta_{PH}+2)y}{z(1-z)} \right] f'_H(z) + \left[ \frac{v'_{PH}(v'_{PH}-1) - (\alpha_{PH}+\beta_{PH})(\alpha_{PH}+\beta_{PH}+1)}{z(1-z)} \right] f_H(z) = 0 \tag{60}$$

The general AIM type as follow,

$$f''_{n_r}(z) = \lambda_0(z)f'_{n_r}(z) + s_0(z)f_{n_r}(z) \tag{61}$$

By compare equation (60) and (61) we have,

$$\lambda_{0_{PH}} = \frac{(2\alpha_{PH} + 2\beta_{PH} + 2)z - (2\alpha_{PH} + 1)}{z(1-z)} \quad (62)$$

$$s_{0_{PH}} = \frac{(\alpha_{PH} + \beta_{PH})(\alpha_{PH} + \beta_{PH} + 1) - v'_{PH}(v'_{PH} - 1)}{z(1-z)} \quad (63)$$

We can be written,

$$\lambda_{0_{PH}} = \frac{-(2\alpha_{PH} + 1)}{z} + \frac{(2\beta_{PH} + 1)}{1-z} \quad (64)$$

$$s_o = \left[ \begin{array}{c} \frac{(\alpha_{PH} + \beta_{PH})(\alpha_{PH} + \beta_{PH} + 1) - v'_{PH}(v'_{PH} - 1)}{z} \\ + \frac{(\alpha_{PH} + \beta_{PH})(\alpha_{PH} + \beta_{PH} + 1) - v'_{PH}(v'_{PH} - 1)}{(1-z)} \end{array} \right] \quad (65)$$

Next the general AIM type is given

$$f''''_{n_r}(z) = \lambda_1(z)f'_{n_r}(z) + s_1(z)f_{n_r}(z) \quad (66)$$

where

$$\begin{aligned} \lambda_1(z) &= \lambda_0'(z) + s_0(z) + \lambda_0^2(z) \\ s_1(z) &= s_0'(z) + s_0(z)\lambda_0(z) \end{aligned} \quad (67)$$

We have differential of equation (64) and (65)

$$\lambda'_{0_{PH}} = \frac{(2\alpha_{PH} + 1)}{z^2} + \frac{(2\beta_{PH} + 1)}{(1-z)^2} \quad (68)$$

$$s'_{0_{PH}} = \left[ \begin{array}{c} -\frac{(\alpha_{PH} + \beta_{PH})(\alpha_{PH} + \beta_{PH} + 1) - v'_{PH}(v'_{PH} - 1)}{z^2} \\ + \frac{(\alpha_{PH} + \beta_{PH})(\alpha_{PH} + \beta_{PH} + 1) - v'_{PH}(v'_{PH} - 1)}{(1-z)^2} \end{array} \right] \quad (69)$$

So, equation (60) is substituted in equation (62)-(63) and (68)-(69), we get

$$\lambda_{1_{PH}}(z) = \left[ \begin{aligned} & \left( \frac{(2\alpha_{PH} + 1)}{z^2} + \frac{(2\beta_{PH} + 1)}{(1-z)^2} \right) \\ & + \frac{\left( \frac{(\alpha_{PH} + \beta_{PH})(\alpha_{PH} + \beta_{PH} + 1) - v'_{PH}(v'_{PH} - 1)}{z} \right)}{\left( \frac{(\alpha_{PH} + \beta_{PH})(\alpha_{PH} + \beta_{PH} + 1) - v'_{PH}(v'_{PH} - 1)}{(1-z)} \right)} \\ & + \left( \frac{-(2\alpha_{PH} + 1)}{z} + \frac{(2\beta_{PH} + 1)}{(1-z)} \right)^2 \end{aligned} \right] \quad (70)$$

$$s_{1_{PH}}(z) = \left[ \begin{aligned} & \left( -\frac{(\alpha_{PH} + \beta_{PH})(\alpha_{PH} + \beta_{PH} + 1) - v'_{PH}(v'_{PH} - 1)}{z^2} \right) \\ & + \frac{(\alpha_{PH} + \beta_{PH})(\alpha_{PH} + \beta_{PH} + 1) - v'_{PH}(v'_{PH} - 1)}{(1-z)^2} \\ & + \frac{\left( \frac{(\alpha_{PH} + \beta_{PH})(\alpha_{PH} + \beta_{PH} + 1) - v'_{PH}(v'_{PH} - 1)}{z} \right)}{\left( \frac{(\alpha_{PH} + \beta_{PH})(\alpha_{PH} + \beta_{PH} + 1) - v'_{PH}(v'_{PH} - 1)}{(1-z)} \right)} \left( \frac{-(2\alpha_{PH} + 1)}{z} + \frac{(2\beta_{PH} + 1)}{(1-z)} \right) \end{aligned} \right] \quad (71)$$

To get eigen value, we use

$$\Delta_k(z) = \lambda_k(z)s_{k-1}(z) - \lambda_{k-1}(z)s_k(z) = 0$$

$$\Delta_1(z) = \lambda_1(z)s_0(z) - \lambda_0(z)s_1(z) = 0 \quad (72)$$

$$\Delta_1(z) = \left[ \begin{aligned} & \left( \frac{(2\alpha_{PH} + 1)}{z^2} + \frac{(2\beta_{PH} + 1)}{(1-z)^2} \right) \\ & + \frac{\left( \frac{(\alpha_{PH} + \beta_{PH})(\alpha_{PH} + \beta_{PH} + 1) - v'_{PH}(v'_{PH} - 1)}{z} \right)}{\left( \frac{(\alpha_{PH} + \beta_{PH})(\alpha_{PH} + \beta_{PH} + 1) - v'_{PH}(v'_{PH} - 1)}{(1-z)} \right)} \\ & + \left( \frac{-(2\alpha_{PH} + 1)}{z} + \frac{(2\beta_{PH} + 1)}{(1-z)} \right)^2 \end{aligned} \right] \left[ \begin{aligned} & \left( -\frac{(\alpha_{PH} + \beta_{PH})(\alpha_{PH} + \beta_{PH} + 1) - v'_{PH}(v'_{PH} - 1)}{z^2} \right) \\ & + \frac{(\alpha_{PH} + \beta_{PH})(\alpha_{PH} + \beta_{PH} + 1) - v'_{PH}(v'_{PH} - 1)}{(1-z)^2} \\ & + \frac{\left( \frac{(\alpha_{PH} + \beta_{PH})(\alpha_{PH} + \beta_{PH} + 1) - v'_{PH}(v'_{PH} - 1)}{z} \right)}{\left( \frac{(\alpha_{PH} + \beta_{PH})(\alpha_{PH} + \beta_{PH} + 1) - v'_{PH}(v'_{PH} - 1)}{(1-z)} \right)} \left( \frac{-(2\alpha_{PH} + 1)}{z} + \frac{(2\beta_{PH} + 1)}{(1-z)} \right) \end{aligned} \right] = 0 \quad (73)$$

To get simple equation (73), we use

$$A = (2\alpha_{PH} + 1) \quad (74)$$

$$B = (2\beta_{PH} + 1) \quad (75)$$

$$C = (\alpha_{PH} + \beta_{PH})(\alpha_{PH} + \beta_{PH} + 1) - v'_{PH}(v'_{PH} - 1) \quad (76)$$

So equation (73) become,

$$\Delta_1(z) = \left[ \left( \left( \frac{A}{z^2} + \frac{B}{(1-z)^2} \right) + \left( \frac{C}{z} + \frac{C}{(1-z)} \right) + \left( \frac{-A}{z} + \frac{B}{1-z} \right)^2 \right) \left( \frac{C}{z} + \frac{C}{(1-z)} \right) - \left( \frac{-A}{z} + \frac{B}{1-z} \right) \left( \left( -\frac{C}{z^2} + \frac{C}{(1-z)^2} \right) + \left( \frac{C}{z} + \frac{C}{(1-z)} \right) \left( \frac{-A}{z} + \frac{B}{1-z} \right) \right) \right] = 0 \quad (77)$$

$$\Delta_1(z) = \left( \frac{C}{z} + \frac{C}{(1-z)} \right) \left[ \left( \left( \frac{A}{z^2} + \frac{B}{(1-z)^2} \right) + \left( \frac{C}{z} + \frac{C}{(1-z)} \right) + \left( \frac{-A}{z} + \frac{B}{1-z} \right)^2 \right) - \left( \frac{-A}{z} + \frac{B}{1-z} \right) \left( \left( -\frac{1}{z} + \frac{1}{(1-z)} \right) + \left( \frac{-A}{z} + \frac{B}{1-z} \right) \right) \right] = 0$$

$$\Delta_1(z) = \left( \frac{C}{z} + \frac{C}{(1-z)} \right) \left[ \left( \left( \frac{A}{z^2} + \frac{B}{(1-z)^2} \right) + \left( \frac{C}{z} + \frac{C}{(1-z)} \right) + \left( \frac{-A}{z} + \frac{B}{1-z} \right)^2 \right) - \left( \frac{-A}{z} + \frac{B}{1-z} \right) \left( -\frac{1}{z} + \frac{1}{(1-z)} \right) \right] = 0$$

$$\Delta_1(z) = \left( \frac{C}{z} + \frac{C}{(1-z)} \right) \left[ \left( \left( \frac{A}{z^2} + \frac{B}{(1-z)^2} \right) + \left( \frac{C}{z} + \frac{C}{(1-z)} \right) \right) - \left( \frac{-A}{z} + \frac{B}{1-z} \right) \left( -\frac{1}{z} + \frac{1}{(1-z)} \right) \right] = 0$$

$$\Delta_1(z) = \left( \frac{C}{z} + \frac{C}{1-z} \right) \left[ \left( \left( \frac{A}{z^2} + \frac{B}{(1-z)^2} \right) + \left( \frac{C}{z} + \frac{C}{1-z} \right) \right) - \left( \frac{-A}{z} + \frac{B}{1-z} \right) \left( \frac{-(1-z)+z}{z(1-z)} \right) \right] = 0$$

$$\Delta_1(z) = \left( \frac{C}{z} + \frac{C}{1-z} \right) \left[ \left( \left( \frac{A}{z^2} + \frac{B}{(1-z)^2} \right) + \left( \frac{C}{z} + \frac{C}{1-z} \right) \right) - \left( \frac{-A}{z} + \frac{B}{1-z} \right) \left( \frac{2z-1}{z(1-z)} \right) \right] = 0$$

$$\Delta_1(z) = \left( \frac{C}{z} + \frac{C}{1-z} \right) \left[ \left( \left( \frac{A(1-z)^2 + Bz^2}{z^2(1-z)^2} \right) + \left( \frac{Cz(1-z)^2 + Cz^2(1-z)}{z^2(1-z)^2} \right) \right) - \left( \frac{-A(1-z) + B}{z^2(1-z)^2} \right) (2z-1) \right] = 0$$

$$\Delta_1(z) = \left( \frac{C}{z} + \frac{C}{1-z} \right) \left[ \left( \frac{A(1-z)^2 + Bz^2}{z^2(1-z)^2} \right) + \left( \frac{Cz(1-z)^2 + Cz^2(1-z)}{z^2(1-z)^2} \right) + \left( \frac{-A(1-z) + Bz}{z^2(1-z)^2} \right) - 2z \left( \frac{-A(1-z) + Bz}{z^2(1-z)^2} \right) \right] = 0$$

$$\Delta_1(z) = \left( \frac{C}{z} + \frac{C}{1-z} \right) \left[ \left( \frac{A(1-2z+z^2) + Bz^2}{z^2(1-z)^2} \right) + \left( \frac{Cz(1-2z+z^2) + Cz^2(1-z)}{z^2(1-z)^2} \right) + \left( \frac{-A(1-z) + Bz}{z^2(1-z)^2} \right) - 2z \left( \frac{-A(1-z) + Bz}{z^2(1-z)^2} \right) \right] = 0$$

$$\Delta_1(z) = \left( \frac{C}{z} + \frac{C}{1-z} \right) \left[ \left( \frac{A(1-2z+z^2) + Bz^2}{z^2(1-z)^2} \right) + \left( \frac{Cz - 2Cz^2 + Cz^3 + Cz^2 - Cz^3}{z^2(1-z)^2} \right) + \left( \frac{-A(1-z) + Bz}{z^2(1-z)^2} \right) - 2z \left( \frac{-A(1-z) + Bz}{z^2(1-z)^2} \right) \right] = 0$$

$$\Delta_1(z) = \left( \frac{C}{z} + \frac{C}{1-z} \right) \left[ \left( \frac{A(1-2z+z^2) + Bz^2}{z^2(1-z)^2} \right) + \left( \frac{Cz - Cz^2}{z^2(1-z)^2} \right) + \left( \frac{-A(1-z) + Bz}{z^2(1-z)^2} \right) - 2z \left( \frac{-A(1-z) + Bz}{z^2(1-z)^2} \right) \right] = 0$$



$$\begin{aligned}
\Delta_1(z) &= \left( \frac{C}{z} + \frac{C}{(1-z)} \right) \left[ \left( \frac{A - 2Az + Az^2 + Bz^2 + Cz - Cz^2 - A + Az + Bz + 2Az - 2Az^2 - 2Bz^2}{z^2(1-z)^2} \right) \right] = 0 \\
\Delta_1(z) &= \left( \frac{C}{z} + \frac{C}{(1-z)} \right) \left[ \left( \frac{-Az^2 - Bz^2 - Cz^2 + Cz + Az + Bz}{z^2(1-z)^2} \right) \right] = 0 \\
\Delta_1(z) &= \left( \frac{C}{z} + \frac{C}{(1-z)} \right) \left[ \left( \frac{(A+B+C)z - (A+B+C)z^2}{z^2(1-z)^2} \right) \right] = 0 \\
\Delta_1(z) &= \left( \frac{C}{z} + \frac{C}{(1-z)} \right) \left[ \left( \frac{(A+B+C)z(1-z)}{z^2(1-z)^2} \right) \right] = 0 \\
\Delta_1(z) &= \left( \frac{C}{z} + \frac{C}{(1-z)} \right) \left[ \left( \frac{(A+B+C)}{z(1-z)} \right) \right] = 0 \\
\Delta_1(z) &= \left( \frac{C(1-z) + Cz}{z(1-z)} \right) \left[ \left( \frac{(A+B+C)}{z(1-z)} \right) \right] = 0 \\
\Delta_1(z) &= \left( \frac{C}{z(1-z)} \right) \left[ \left( \frac{(A+B+C)}{z(1-z)} \right) \right] = 0
\end{aligned} \tag{78}$$

Then inserting equation (74)-(76) in equation (78), we obtain

$$\Delta_1(z) = \left\{ \left[ \left( \frac{(\alpha_{PH} + \beta_{PH})(\alpha_{PH} + \beta_{PH} + 1) - v'_{PH}(v'_{PH} - 1)}{z(1-z)} \right) \right] \left[ \left( \frac{((2\alpha_{PH} + 1) + (2\beta_{PH} + 1) + (\alpha_{PH} + \beta_{PH})(\alpha_{PH} + \beta_{PH} + 1) - v'_{PH}(v'_{PH} - 1))}{z(1-z)} \right) \right] \right\} = 0 \tag{79}$$

So, we obtain eigen value is given

$$\begin{aligned}
(\alpha_{PH} + \beta_{PH})(\alpha_{PH} + \beta_{PH} + 1) - v'_{PH}(v'_{PH} - 1) &= 0 \\
(\alpha_{PH} + \beta_{PH})(\alpha_{PH} + \beta_{PH} + 1) &= v'_{PH}(v'_{PH} - 1)
\end{aligned} \tag{80}$$

and

$$\begin{aligned}
((2\alpha_{PH} + 1) + (2\beta_{PH} + 1) + (\alpha_{PH} + \beta_{PH})(\alpha_{PH} + \beta_{PH} + 1) - v'_{PH}(v'_{PH} - 1)) &= 0 \\
v'_{PH}(v'_{PH} - 1) &= (2\alpha_{PH} + 2\beta_{PH} + 2 + \alpha_{PH}^2 + \alpha_{PH}\beta_{PH} + \alpha_{PH} + \beta_{PH}^2 + \alpha_{PH}\beta_{PH} + \beta_{PH}) \\
v'_{PH}(v'_{PH} - 1) &= (\alpha_{PH}^2 + \beta_{PH}^2 + 2\alpha_{PH}\beta_{PH} + 3\alpha_{PH} + 3\beta_{PH} + 2) \\
v'_{PH}(v'_{PH} - 1) &= (\alpha_{PH} + \beta_{PH} + 1)(\alpha_{PH} + \beta_{PH} + 2)
\end{aligned} \tag{81}$$

From equation (80) and (81), we have

$$\dot{v}_{PH}(\dot{v}_{PH} - 1) = (\alpha_{PH} + \beta_{PH} + n)(\alpha_{PH} + \beta_{PH} + (n+1)) \quad (82)$$

The eigen value is used to obtain energy of Klein Gordon equation in minimal length effect. To get energy follow as

$$\begin{aligned} \dot{v}_{PH}(\dot{v}_{PH} - 1) &= (\alpha_{PH} + \beta_{PH} + 1)(\alpha_{PH} + \beta_{PH} + (n+1)) \\ \dot{v}_{PH}(\dot{v}_{PH} - 1) &= (\alpha_{PH} + \beta_{PH} + (n+1))^2 - (\alpha_{PH} + \beta_{PH} + (n+1)) \end{aligned} \quad (83)$$

where

$$\dot{v}_{PH}(\dot{v}_{PH} - 1) = \xi_H$$

$$X = (\alpha + \beta + (n+1))$$

So we have

$$\xi_H = X^2 - X$$

$$\xi_H = X(X-1)$$

$$\xi_H = \left(X - \frac{1}{2}\right)^2 - \frac{1}{4}$$

$$\xi_H + \frac{1}{4} = \left(X - \frac{1}{2}\right)^2$$

$$\sqrt{\xi_H + \frac{1}{4}} = \left(X - \frac{1}{2}\right)$$

$$\sqrt{\xi_H + \frac{1}{4}} = \alpha_{PH} + \beta_{PH} + (n+1) - \frac{1}{2}$$

$$\sqrt{\xi_H + \frac{1}{4}} = \alpha_{PH} + \beta_{PH} + n + \frac{1}{2}$$

$$\alpha_{PH} + \beta_{PH} = \sqrt{\xi_H + \frac{1}{4}} - \left(n + \frac{1}{2}\right)$$

$$(\alpha_{PH} + \beta_{PH})^2 = \left(\sqrt{\xi_H + \frac{1}{4}} - \left(n + \frac{1}{2}\right)\right)^2$$

$$\alpha_{PH}^2 + 2\alpha_{PH}\beta_{PH} + \beta_{PH}^2 = \left(\sqrt{\xi_H + \frac{1}{4}} - \left(n + \frac{1}{2}\right)\right)^2 \quad (84)$$

Then, inserting equation  $-2q'_{PH} + \kappa'^2_{PH} = 4\alpha'^2_{PH}$  and  $2q'_{PH} + \kappa'^2_{PH} = 4\beta'^2_{PH}$  in equation (86), we obtain

$$\begin{aligned}
\alpha'^2_{PH} + \beta'^2_{PH} + 2\alpha'_{PH}\beta'_{PH} &= \left( \sqrt{\xi_H + \frac{1}{4}} - \left( n + \frac{1}{2} \right) \right)^2 \\
\frac{-2q'_{PH} + \kappa'^2_{PH}}{4} + \frac{2q'_{PH} + \kappa'^2_{PH}}{4} + 2 \left( \sqrt{\frac{-2q'_{PH} + \kappa'^2_{PH}}{4}} \right) \left( \sqrt{\frac{2q'_{PH} + \kappa'^2_{PH}}{4}} \right) &= \left( \sqrt{\xi_H + \frac{1}{4}} - \left( n + \frac{1}{2} \right) \right)^2 \\
\frac{\kappa'^2_{PH}}{2} + 2 \left( \sqrt{\frac{-2q'_{PH} + \kappa'^2_{PH}}{4}} \right) \left( \sqrt{\frac{2q'_{PH} + \kappa'^2_{PH}}{4}} \right) &= \left( \sqrt{\xi_H + \frac{1}{4}} - \left( n + \frac{1}{2} \right) \right)^2 \\
\frac{\kappa'^2_{PH}}{2} + 2 \left( \sqrt{\frac{\kappa'^4_{PH} - 4q'^2_{PH}}{16}} \right) &= \left( \sqrt{\xi_H + \frac{1}{4}} - \left( n + \frac{1}{2} \right) \right)^2 \\
\frac{\kappa'^2_{PH}}{2} + \frac{1}{2} \sqrt{\kappa'^4_{PH} - 4q'^2_{PH}} &= \left( \sqrt{\xi_H + \frac{1}{4}} - \left( n + \frac{1}{2} \right) \right)^2 \\
\frac{1}{2} \sqrt{\kappa'^4_{PH} - 4q'^2_{PH}} &= \left( \sqrt{\xi_H + \frac{1}{4}} - \left( n + \frac{1}{2} \right) \right)^2 - \frac{\kappa'^2_{PH}}{2} \\
\left( \frac{1}{2} \sqrt{\kappa'^4_{PH} - 4q'^2_{PH}} \right)^2 &= \left( \left( \sqrt{\xi_H + \frac{1}{4}} - \left( n + \frac{1}{2} \right) \right)^2 - \frac{\kappa'^2_{PH}}{2} \right)^2 \\
\frac{\kappa'^4_{PH}}{4} - \frac{4q'^2_{PH}}{4} &= \left( \sqrt{\xi_H + \frac{1}{4}} - \left( n + \frac{1}{2} \right) \right)^4 - \kappa'^2_{PH} \left( \sqrt{\xi_H + \frac{1}{4}} - \left( n + \frac{1}{2} \right) \right)^2 + \frac{\kappa'^4_{PH}}{4} \\
-\frac{4q'^2_{PH}}{4} &= \left( \sqrt{\xi_H + \frac{1}{4}} - \left( n + \frac{1}{2} \right) \right)^4 - \kappa'^2_{PH} \left( \sqrt{\xi_H + \frac{1}{4}} - \left( n + \frac{1}{2} \right) \right)^2 \\
\kappa'^2_{PH} \left( \sqrt{\xi_H + \frac{1}{4}} - \left( n + \frac{1}{2} \right) \right)^2 &= \left( \sqrt{\xi_H + \frac{1}{4}} - \left( n + \frac{1}{2} \right) \right)^4 + \frac{4q'^2_{PH}}{4} \\
\kappa'^2_{PH} &= \left( \sqrt{\xi_H + \frac{1}{4}} - \left( n + \frac{1}{2} \right) \right)^2 + \frac{4q'^2_{PH}}{4 \left( \sqrt{\xi_H + \frac{1}{4}} - \left( n + \frac{1}{2} \right) \right)^2} \\
\kappa'^2_{PH} &= \left( \sqrt{\xi_H + \frac{1}{4}} - \left( n + \frac{1}{2} \right) \right)^2 + \frac{q'^2_{PH}}{\left( \sqrt{\xi_H + \frac{1}{4}} - \left( n + \frac{1}{2} \right) \right)^2}
\end{aligned}$$

So we have energy equation of Klein Gordon equation in minimal length effect is given

$$\kappa'^2_{PH} = \left( \sqrt{v'_{PH} (v'_{PH} - 1) + \frac{1}{4}} - \left( n + \frac{1}{2} \right) \right)^2 + \frac{q'^2_{PH}}{\left( \sqrt{v'_{PH} (v'_{PH} - 1) + \frac{1}{4}} - \left( n + \frac{1}{2} \right) \right)^2}$$

(85)

To get approximate follow as,

$$\begin{aligned}
v'_{PH} (v'_{PH} - 1) &= \frac{v_{PH} (v_{PH} - 1)}{\omega_H^2} = \frac{1}{\omega_H^2} \left( \omega_H^2 L(L+1) + \alpha_{ML} (E + M_o)^2 \frac{(V_o \omega_H)^2}{2} \right) \\
v'_{PH} (v'_{PH} - 1) + \frac{1}{4} &= \frac{\left( \omega_H^2 L(L+1) + \alpha_{ML} (E + M_o)^2 \frac{(V_o \omega_H)^2}{2} \right)}{\omega_H^2} + \frac{1}{4} \\
\left( v'_{PH} - \frac{1}{2} \right)^2 &= \frac{\left( \omega_H^2 L(L+1) + \alpha_{ML} (E + M_o)^2 \frac{(V_o \omega_H)^2}{2} \right)}{\omega_H^2} + \frac{1}{4} \\
\left( v'_{PH} - \frac{1}{2} \right) &= \sqrt{\frac{\left( \omega_H^2 L(L+1) + \alpha_{ML} (E + M_o)^2 \frac{(V_o \omega_H)^2}{2} \right)}{\omega_H^2}} + \frac{1}{4} \\
v'_{PH} &= \frac{1}{2} + \sqrt{\frac{\left( \omega_H^2 L(L+1) + \alpha_{ML} (E + M_o)^2 \frac{(V_o \omega_H)^2}{2} \right)}{\omega_H^2}} + \frac{1}{4}
\end{aligned} \tag{86}$$

Next equation,

$$\begin{aligned}
2q' &= \frac{2q_{PH}}{\omega_H^2} = \frac{1}{\omega_H^2} \left( (E + M_o) \frac{(V_o \omega_H)}{2} + \alpha_{ML} (E + M_o)^2 (V_o \omega_H)^2 - 2\alpha_{ML} (E^2 - M_o^2) (E + M_o) (V_o \omega_H) \right) \\
q' &= \frac{2q}{2\omega_H^2} = \frac{1}{2\omega_H^2} \left( (E + M_o) \frac{(V_o \omega_H)}{2} + \alpha_{ML} (E + M_o)^2 (V_o \omega_H)^2 - 2\alpha_{ML} (E^2 - M_o^2) (E + M_o) (V_o \omega_H) \right)
\end{aligned} \tag{87}$$

and equation,

$$\kappa_{PH}^2 = \frac{\kappa_{PH}^2}{\omega_H^2} = -\frac{1}{\omega_H^2} \left( \begin{aligned} &(E^2 - M_o^2) - (E + M_o) \frac{(V_o \omega_H)}{2} + 2\alpha_{ML} (E^2 - M_o^2) (E + M_o) (V_o \omega_H) \\ &- \alpha_{ML} (E + M_o)^2 (V_o \omega_H)^2 - 2\alpha_{ML} (E^2 - M_o^2)^2 \end{aligned} \right) \tag{88}$$

So equation (86)-(88) is substituted in equation (85), so we have

$$(E^2 - M_o^2) = \left\{ -\omega_H^2 \left[ \left( \sqrt{v'_{PH} (v'_{PH} - 1) + \frac{1}{4}} - n - \frac{1}{2} \right)^2 + \frac{\left( \frac{1}{2\omega_H^2} \left( (E + M_o) \frac{(V_o \omega_H)}{2} + \alpha_{ML} (E + M_o)^2 (V_o \omega_H)^2 - 2\alpha_{ML} (E^2 - M_o^2) (E + M_o) (V_o \omega_H) \right) \right)^2}{\left( \sqrt{v'_{PH} (v'_{PH} - 1) + \frac{1}{4}} - n - \frac{1}{2} \right)^2} \right] \right. \\
\left. + (E + M_o) \frac{(V_o \omega_H)}{2} + \alpha_{ML} (E + M_o)^2 (V_o \omega_H)^2 + 2\alpha_{ML} (E^2 - M_o^2)^2 - 2\alpha_{ML} (E^2 - M_o^2) (E + M_o) (V_o \omega_H) \right\} \tag{89}$$

Where,

$$v'_{PH} = \frac{1}{2} + \sqrt{\frac{\left( \omega_H^2 L(L+1) + \alpha_{ML} (E + M_o)^2 \frac{(V_o \omega_H)^2}{2} \right)}{\omega_H^2}} + \frac{1}{4} \quad (90)$$

$$\zeta_{PH} = \begin{pmatrix} (E + M_o) \frac{(V_H \omega_H)}{2} + \alpha_{ML} (E + M_o)^2 (V_H \omega_H)^2 \\ -2\alpha_{ML} (E^2 - M_o^2) (E + M_o) (V_H \omega_H) \end{pmatrix} \quad (91)$$

$$\tau_{PH} = \alpha_{ML} (E + M_o)^2 (V_H \omega_H)^2 + 2\alpha_{ML} (E^2 - M_o^2)^2 - 2\alpha_{ML} (E^2 - M_o^2) (E + M_o) (V_H \omega_H) \quad (92)$$

The energy equation of Klein Gordon equation in minimal length effect is given,

$$(E^2 - M_o^2) = -\omega_H^2 \left[ \left( \sqrt{v'_{PH} (v'_{PH} - 1) + \frac{1}{4}} - n - \frac{1}{2} \right)^2 + \frac{\zeta_{PH}}{4 \left( \omega_H^2 \sqrt{v'_{PH} (v'_{PH} - 1) + \frac{1}{4}} - n - \frac{1}{2} \right)^2} \right] + (E + M_o) \frac{V_H}{2} + \tau_{PH} \quad (93)$$

## Wave Function of Klein-Gordon equation

Equation (60) is reduce to,

$$f_H''(z) = - \left[ \frac{(2\alpha_{PH} + 1) - (2\alpha_{PH} + 2\beta_{PH} + 2)z}{z(1-z)} \right] f_H'(z) - \left[ \frac{v_{PH}'(v_{PH}' - 1) - (\alpha_{PH} + \beta_{PH})(\alpha_{PH} + \beta_{PH} + 1)}{z(1-z)} \right] f_H(z) \quad (94)$$

$$f''(z) = \left[ \frac{(2\alpha_{PH} + 2\beta_{PH} + 2)z - (2\alpha_{PH} + 1)}{z(1-z)} \right] f'(z) + \left[ \frac{(\alpha_{PH} + \beta_{PH})(\alpha_{PH} + \beta_{PH} + 1) - v_{PH}'(v_{PH}' - 1)}{z(1-z)} \right] f(z)$$

$$f''(z) = \left[ \frac{(2\alpha_{PH} + 2\beta_{PH} + 2)z}{z(1-z)} - \frac{(2\alpha_{PH} + 1)}{z(1-z)} \right] f'(z) + \left[ \frac{(\alpha_{PH} + \beta_{PH})(\alpha_{PH} + \beta_{PH} + 1)}{z(1-z)} - \frac{v_{PH}'(v_{PH}' - 1)}{z(1-z)} \right] f(z)$$

$$f''(z) = \left[ \frac{(2\alpha_{PH} + 2\beta_{PH} + 2)z}{z(1-z)} - \frac{(2\alpha_{PH} + 1)}{z} - \frac{(2\alpha_{PH} + 1)}{(1-z)} \right] f'(z) + \left[ \frac{(\alpha_{PH} + \beta_{PH})(\alpha_{PH} + \beta_{PH} + 1)}{z(1-z)} - \frac{v_{PH}'(v_{PH}' - 1)}{z(1-z)} \right] f(z)$$

$$f''(z) = \left[ \frac{(2\alpha_{PH} + 2\beta_{PH} + 2)}{(1-z)} - \frac{(2\alpha_{PH} + 1)}{z} - \frac{(2\alpha_{PH} + 1)}{(1-z)} \right] f'(z) + \left[ \frac{(\alpha_{PH} + \beta_{PH})(\alpha_{PH} + \beta_{PH} + 1)}{z(1-z)} - \frac{v_{PH}'(v_{PH}' - 1)}{z(1-z)} \right] f(z)$$

$$f''(z) = \left[ \frac{(2\alpha_{PH} + 2\beta_{PH} + 2 - 2\alpha_{PH} - 1)}{(1-z)} - \frac{(2\alpha_{PH} + 1)}{z} \right] f'(z) + \left[ \frac{(\alpha_{PH} + \beta_{PH})(\alpha_{PH} + \beta_{PH} + 1)}{z(1-z)} - \frac{v_{PH}'(v_{PH}' - 1)}{z(1-z)} \right] f(z)$$

$$f''(z) = \left[ \frac{(2\beta_{PH} + 1)}{(1-z)} - \frac{(2\alpha_{PH} + 1)}{z} \right] f'(z) + \left[ \frac{(\alpha_{PH} + \beta_{PH})(\alpha_{PH} + \beta_{PH} + 1)}{z(1-z)} - \frac{v_{PH}'(v_{PH}' - 1)}{z(1-z)} \right] f(z)$$

$$f_H''(z) = 2 \left[ \frac{\left(\beta_{PH} + \frac{1}{2}\right)}{(1-z)} - \frac{\left(\alpha_{PH} + \frac{1}{2}\right)}{z} \right] f_H'(z) + \left[ \frac{(\alpha_{PH} + \beta_{PH})(\alpha_{PH} + \beta_{PH} + 1) - v_{PH}'(v_{PH}' - 1)}{z(1-z)} \right] f_H(z) \quad (95)$$

Equation (95) is eigen function,

$$g_{n_r}''(z_p) = 2 \left\{ \frac{ax^{N+1}}{1-bz^{N+1}} - \frac{t-1}{z} \right\} g_{n_r}'(z_p) + \frac{Wz^N}{(1-bz)} g_{n_r}(z_p) = 0 \quad (96)$$

By comparing equation (96) and (95), we have

$$a_{PH} = \left( \beta_{PH} + \frac{1}{2} \right) \quad (97)$$

$$N_{PH} = -1 \quad (98)$$

$$b_{PH} = 1 \quad (99)$$

$$t_{PH} = \left( \alpha_{PH} - \frac{1}{2} \right) \quad (100)$$

$$(\sigma_{A_{PH}})_n = \frac{\Gamma(\sigma_A + n)}{\Gamma(\sigma_A)}$$

with,

$$\begin{aligned}\sigma_{A_{PH}} &= \frac{2t_{PH} + N_{PH} + 3}{N_{PH} + 2} \\ &= \frac{2\left(\alpha_{PH} - \frac{1}{2}\right) + (-1) + 3}{-1 + 2}\end{aligned}$$

$$\sigma_{A_{PH}} = 2\alpha_{PH} + 1 \quad (101)$$

and

$$\begin{aligned}\rho_{PH} &= \frac{(2t_{PH} + 1)b_{PH} + 2a_{PH}}{(N_{PH} + 2)b_{PH}} \\ &= \frac{\left(2\left(\alpha_{PH} - \frac{1}{2}\right) + 1\right)1 + 2\left(\beta_{PH} + \frac{1}{2}\right)}{(-1 + 2)1}\end{aligned}$$

$$\rho_{PH} = 2\alpha_{PH} + 2\beta_{PH} + 1 \quad (102)$$

By using equation (97)-(102), we get,

$$f_H(z) = (-1)^n C'(1)^n (2\alpha_{PH} + 1)_n {}_2F_1(-n, 2\alpha_{PH} + 2\beta_{PH} + 1 + n, 2\alpha_{PH} + 1, z) \quad (103)$$

$$U_H(r) = z^{\alpha_{PH}} (1-z)^{\beta_{PH}} (-1)^n C'(1)^n (2\alpha_{PH} + 1)_n {}_2F_1(-n, 2\alpha_{PH} + 2\beta_{PH} + 1 + n, 2\alpha_{PH} + 1, z) \quad (104)$$

The variable is change become

|                                                                                                                                 |                                                                                                                                                         |
|---------------------------------------------------------------------------------------------------------------------------------|---------------------------------------------------------------------------------------------------------------------------------------------------------|
| $\begin{aligned}\coth \rho r &= (1 - 2y) \\ 2y &= 1 - \coth \rho r \\ y &= \frac{1 - \coth \rho r}{2}\end{aligned} \quad (105)$ | $\begin{aligned}1 - y &= 1 - \frac{1 - \coth \rho r}{2} \\ &= \frac{2 - 1 + \coth \rho r}{2} \\ &= \frac{1 + \coth \rho r}{2}\end{aligned} \quad (106)$ |
|---------------------------------------------------------------------------------------------------------------------------------|---------------------------------------------------------------------------------------------------------------------------------------------------------|

By applying equation (104)-(106), Wave function for  $n = 0$

$${}_2F_1(-n, 2\alpha_{PH} + 2\beta_{PH} + 1 + n, 2\alpha_{PH} + 1, z) = 1 \quad (107)$$

$$U_H(r) = z^{\alpha_{PH}} (1-z)^{\beta_{PH}} f_0(z) \quad (108)$$

$$U_{H_0}(z) = C' \left( \frac{1 - \coth \omega_H r}{2} \right)^{\alpha_{PH}} \left( \frac{1 + \coth \omega_H r}{2} \right)^{\beta_{PH}} \quad (109)$$

Wave function  $n = 1$ ,

$$f_1(z) = (-1)^1 C'(1)^1 (2\alpha_{PH} + 1) {}_2F_1(-1, 2\alpha_{PH} + 2\beta_{PH} + 2, 2\alpha_{PH} + 1, z) \quad (110)$$

$${}_2F_1(-1, 2\alpha_{PH} + 2\beta_{PH} + 2, 2\alpha_{PH} + 1, z) = 1 + \frac{(-1)(2\alpha_{PH} + 2\beta_{PH} + 2) \left( \frac{1 - \coth \omega_H r}{2} \right)}{(2\alpha_{PH} + 1)} \quad (111)$$

$$U_{H_1}(z) = \left\{ \begin{array}{l} -C' \left( \frac{1 - \coth \omega_H r}{2} \right)^{\alpha_{PH}} \left( \frac{1 + \coth \omega_H r}{2} \right)^{\beta_{PH}} (2\alpha_{PH} + 1) \\ \left[ 1 + \frac{(-1)(2\alpha_{PH} + 2\beta_{PH} + 2) \left( \frac{1 - \coth \omega_H r}{2} \right)}{(2\alpha_{PH} + 1)1!} \right] \end{array} \right\} \quad (112)$$

Wave function  $n = 2$ ,

$$f_2(z) = (-1)^2 C'(1)^2 (2\alpha_{PH} + 1)(2\alpha_{PH} + 2) {}_2F_1(-2, 2\alpha_{PH} + 2\beta_{PH} + 3, 2\alpha_{PH} + 1, z) \quad (113)$$

$${}_2F_1(-2, 2\alpha_{PH} + 2\beta_{PH} + 3, 2\alpha_{PH} + 1, z) = \left[ \begin{array}{l} 1 + \frac{(-1)(2\alpha_{PH} + 2\beta_{PH} + 2) \left( \frac{1 - \coth \omega_H r}{2} \right)}{(2\alpha_{PH} + 1)1!} \\ + \frac{(-2)(-1)(2\alpha_{PH} + 2\beta_{PH} + 1)(2\alpha_{PH} + 2\beta_{PH} + 4) \left( \frac{1 - \coth \omega_H r}{2} \right)^2}{(2\alpha_{PH} + 1)(2\alpha_{PH} + 2)2!} \end{array} \right] \quad (114)$$

$$U_{H_2}(r) = \left\{ \begin{array}{l} -C' \left( \frac{1 - \coth \omega_H r}{2} \right)^{\alpha_{PH}} \left( \frac{1 + \coth \omega_H r}{2} \right)^{\beta_{PH}} (2\alpha_{PH} + 1)(2\alpha_{PH} + 2) \\ \left[ 1 + \frac{(-1)(2\alpha_{PH} + 2\beta_{PH} + 2) \left( \frac{1 - \coth \omega_H r}{2} \right)}{(2\alpha_{PH} + 1)1!} \right. \\ \left. + \frac{(-2)(-1)(2\alpha_{PH} + 2\beta_{PH} + 1)(2\alpha_{PH} + 2\beta_{PH} + 4) \left( \frac{1 - \coth \omega_H r}{2} \right)^2}{(2\alpha_{PH} + 1)(2\alpha_{PH} + 2)2!} \right] \end{array} \right\} \quad (115)$$
